# Supplementary material for: Exploring the potential relationship between frozen shoulder and Dupuytren’s disease through bioinformatics analysis and machine learning
Source: Front Immunol. 2023 Aug 31;14:1230027. doi: 10.3389/fimmu.2023.1230027 (PMC10500125; doi:10.3389/fimmu.2023.1230027)
Supplement: Supplementary Table 1 — Key TFs predicted according to hub genes. [file Table_1.xlsx]

## Sheet: Sheet1
Key TF	P value	Q value	List of overlapped genes
RELA	2.63e-06	1.49e-05	COL1A2, MMP2, SDC1, COL1A1, BGN
NFKB1	2.71e-06	1.49e-05	SDC1, BGN, COL1A2, MMP2, COL1A1
CEBPZ	8.83e-06	3.24e-05	COL1A2, COL11A1
SP3	9.03e-05	0.000248	ITGA2, COL1A1, MMP2
TWIST2	0.000175	0.000385	POSTN, MMP2
CIITA	0.000271	0.000496	COL1A1, COL1A2
STAT6	0.000366	0.000532	COL1A2, COL1A1
MYB	0.000387	0.000532	COL1A1, COL1A2
TFAP2A	0.00142	0.00174	MMP2, COL1A1
YY1	0.00232	0.00255	COL1A2, POSTN
SP1	0.00565	0.00565	MMP2, COL1A1, ITGA2
