# Supplementary material for: Exploring the potential relationship between frozen shoulder and Dupuytren’s disease through bioinformatics analysis and machine learning
Source: Front Immunol. 2023 Aug 31;14:1230027. doi: 10.3389/fimmu.2023.1230027 (PMC10500125; doi:10.3389/fimmu.2023.1230027)
Supplement: Supplementary Table 2 — KEGG analyses of hub genes. [file Table_2.xlsx]

## Sheet: Sheet1
ID	Description	pvalue	p.adjust	qvalue
hsa04974	Protein digestion and absorption	2.19827e-13	5.93532e-12	3.47095e-12
hsa04512	ECM-receptor interaction	1.11446e-09	1.50452e-08	8.79838e-09
hsa04510	Focal adhesion	5.74e-06	4.26754e-05	2.49564e-05
hsa05205	Proteoglycans in cancer	6.32228e-06	4.26754e-05	2.49564e-05
hsa04933	AGE-RAGE signaling pathway in diabetic complications	9.48624e-06	5.12257e-05	2.99566e-05
hsa04611	Platelet activation	2.22714e-05	0.000100221	5.8609e-05
hsa04926	Relaxin signaling pathway	2.60341e-05	0.000100417	5.87235e-05
hsa05165	Human papillomavirus infection	6.45137e-05	0.000217734	0.00012733
hsa04151	PI3K-Akt signaling pathway	8.89377e-05	0.000266813	0.000156031
hsa05415	Diabetic cardiomyopathy	0.000153218	0.000413689	0.000241923
hsa05146	Amoebiasis	0.000376655	0.000924517	0.000540653
hsa05418	Fluid shear stress and atherosclerosis	0.0167803	0.0377557	0.0220794
