# Supplementary material for: Exploring the potential relationship between frozen shoulder and Dupuytren’s disease through bioinformatics analysis and machine learning
Source: Front Immunol. 2023 Aug 31;14:1230027. doi: 10.3389/fimmu.2023.1230027 (PMC10500125; doi:10.3389/fimmu.2023.1230027)
Supplement: Supplementary Table 3 — GO analyses of hub genes. [file Table_3.xlsx]

## Sheet: Sheet1
ONTOLOGY	ID	Description	pvalue	p.adjust	qvalue
BP	GO:0030199	collagen fibril organization	2.28985e-14	1.05104e-11	5.23049e-12
BP	GO:0030198	extracellular matrix organization	4.41632e-13	5.51575e-11	2.74491e-11
BP	GO:0043062	extracellular structure organization	4.54321e-13	5.51575e-11	2.74491e-11
BP	GO:0045229	external encapsulating structure organization	4.80675e-13	5.51575e-11	2.74491e-11
BP	GO:0071230	cellular response to amino acid stimulus	2.30463e-11	2.11565e-09	1.05285e-09
BP	GO:0071229	cellular response to acid chemical	4.4403e-11	3.39683e-09	1.69043e-09
BP	GO:0032963	collagen metabolic process	1.37079e-10	8.98845e-09	4.4731e-09
BP	GO:0043200	response to amino acid	2.48811e-10	1.42486e-08	7.09082e-09
BP	GO:0035987	endodermal cell differentiation	2.79385e-10	1.42486e-08	7.09082e-09
BP	GO:0001704	formation of primary germ layer	3.88893e-10	1.78502e-08	8.88313e-09
BP	GO:0001101	response to acid chemical	5.14553e-10	2.14709e-08	1.0685e-08
BP	GO:0001706	endoderm formation	6.68679e-10	2.5577e-08	1.27284e-08
BP	GO:0007492	endoderm development	4.1905e-09	1.47957e-07	7.36306e-08
BP	GO:0007369	gastrulation	5.33011e-09	1.74751e-07	8.69649e-08
BP	GO:0061448	connective tissue development	3.93883e-08	1.20528e-06	5.99808e-07
BP	GO:0032964	collagen biosynthetic process	5.78553e-08	1.65972e-06	8.25961e-07
BP	GO:0043588	skin development	7.01649e-08	1.89445e-06	9.42773e-07
BP	GO:0043589	skin morphogenesis	8.85524e-08	2.25809e-06	1.12373e-06
BP	GO:0051216	cartilage development	3.56187e-07	8.60473e-06	4.28214e-06
BP	GO:0001503	ossification	5.55196e-07	1.27417e-05	6.34092e-06
BP	GO:0048705	skeletal system morphogenesis	6.50613e-07	1.42205e-05	7.07685e-06
BP	GO:0060350	endochondral bone morphogenesis	1.21506e-05	0.000253506	0.000126157
BP	GO:0042060	wound healing	1.69075e-05	0.000337414	0.000167914
BP	GO:0009612	response to mechanical stimulus	1.87018e-05	0.000357672	0.000177995
BP	GO:0060346	bone trabecula formation	2.63512e-05	0.000483808	0.000240767
BP	GO:0060348	bone development	2.75983e-05	0.000487216	0.000242463
BP	GO:0033273	response to vitamin	3.97657e-05	0.000676017	0.000336419
BP	GO:0061430	bone trabecula morphogenesis	4.56126e-05	0.00074772	0.000372103
BP	GO:0060349	bone morphogenesis	5.8762e-05	0.00093006	0.000462844
BP	GO:0038065	collagen-activated signaling pathway	7.93839e-05	0.00121457	0.000604432
BP	GO:0002062	chondrocyte differentiation	9.21967e-05	0.00136511	0.000679344
BP	GO:0032355	response to estradiol	0.000110047	0.00154045	0.000766605
BP	GO:0055093	response to hyperoxia	0.000110752	0.00154045	0.000766605
BP	GO:0042542	response to hydrogen peroxide	0.000136127	0.00183771	0.000914536
BP	GO:0042476	odontogenesis	0.000152214	0.00199618	0.000993397
BP	GO:0060343	trabecula formation	0.000188923	0.00240877	0.00119872
BP	GO:0036296	response to increased oxygen levels	0.000203943	0.00253	0.00125905
BP	GO:0007584	response to nutrient	0.000224535	0.00271215	0.0013497
BP	GO:0060325	face morphogenesis	0.000252403	0.00297059	0.00147831
BP	GO:0071295	cellular response to vitamin	0.000269686	0.00309465	0.00154005
BP	GO:0002063	chondrocyte development	0.000305944	0.00326577	0.00162521
BP	GO:0050974	detection of mechanical stimulus involved in sensory perception	0.000305944	0.00326577	0.00162521
BP	GO:0060351	cartilage development involved in endochondral bone morphogenesis	0.000305944	0.00326577	0.00162521
BP	GO:0050954	sensory perception of mechanical stimulus	0.00035513	0.00363753	0.00181021
BP	GO:0018149	peptide cross-linking	0.000364545	0.00363753	0.00181021
BP	GO:0060323	head morphogenesis	0.000364545	0.00363753	0.00181021
BP	GO:0071392	cellular response to estradiol stimulus	0.000450515	0.00439971	0.00218951
BP	GO:0031670	cellular response to nutrient	0.000496843	0.00475106	0.00236436
BP	GO:0000302	response to reactive oxygen species	0.000512089	0.00479692	0.00238718
BP	GO:0085029	extracellular matrix assembly	0.000596157	0.00547272	0.0027235
BP	GO:0061383	trabecula morphogenesis	0.000622367	0.00560131	0.00278749
BP	GO:0010171	body morphogenesis	0.000649129	0.00572981	0.00285144
BP	GO:0050982	detection of mechanical stimulus	0.000732715	0.00622808	0.0030994
BP	GO:0060324	face development	0.000732715	0.00622808	0.0030994
BP	GO:0071560	cellular response to transforming growth factor beta stimulus	0.00116698	0.00966709	0.00481082
BP	GO:0090596	sensory organ morphogenesis	0.00117943	0.00966709	0.00481082
BP	GO:0071559	response to transforming growth factor beta	0.00124295	0.010009	0.00498098
BP	GO:0014823	response to activity	0.00137582	0.010888	0.00541838
BP	GO:0060415	muscle tissue morphogenesis	0.00149511	0.0114376	0.00569191
BP	GO:0071260	cellular response to mechanical stimulus	0.00149511	0.0114376	0.00569191
BP	GO:0048644	muscle organ morphogenesis	0.00179202	0.0134842	0.0067104
BP	GO:0071496	cellular response to external stimulus	0.0020174	0.0149353	0.00743252
BP	GO:0071214	cellular response to abiotic stimulus	0.00214257	0.0153663	0.00764701
BP	GO:0104004	cellular response to environmental stimulus	0.00214257	0.0153663	0.00764701
BP	GO:0070482	response to oxygen levels	0.00217921	0.0153886	0.00765811
BP	GO:0006029	proteoglycan metabolic process	0.00226084	0.0154884	0.0077078
BP	GO:0051591	response to cAMP	0.00226084	0.0154884	0.0077078
BP	GO:0007517	muscle organ development	0.00238774	0.0161172	0.00802074
BP	GO:0048661	positive regulation of smooth muscle cell proliferation	0.00267327	0.0177831	0.00884974
BP	GO:0031589	cell-substrate adhesion	0.00281958	0.0184884	0.00920073
BP	GO:0032526	response to retinoic acid	0.00323493	0.0209131	0.0104074
BP	GO:0007229	integrin-mediated signaling pathway	0.00353476	0.0225341	0.0112141
BP	GO:0009410	response to xenobiotic stimulus	0.00439535	0.027233	0.0135525
BP	GO:0006979	response to oxidative stress	0.00445256	0.027233	0.0135525
BP	GO:0046683	response to organophosphorus	0.00450916	0.027233	0.0135525
BP	GO:0048706	embryonic skeletal system development	0.00450916	0.027233	0.0135525
BP	GO:0009581	detection of external stimulus	0.00514699	0.0306814	0.0152686
BP	GO:0007266	Rho protein signal transduction	0.00536835	0.0311908	0.0155221
BP	GO:0009582	detection of abiotic stimulus	0.00536835	0.0311908	0.0155221
BP	GO:0014074	response to purine-containing compound	0.00551834	0.0316615	0.0157563
BP	GO:0031667	response to nutrient levels	0.00569406	0.0322663	0.0160573
BP	GO:0007605	sensory perception of sound	0.00687034	0.0379938	0.0189076
BP	GO:0048592	eye morphogenesis	0.00687034	0.0379938	0.0189076
BP	GO:0031960	response to corticosteroid	0.00738006	0.0403268	0.0200686
BP	GO:0001542	ovulation from ovarian follicle	0.00790885	0.041726	0.0207649
BP	GO:0014012	peripheral nervous system axon regeneration	0.00790885	0.041726	0.0207649
BP	GO:0018401	peptidyl-proline hydroxylation to 4-hydroxy-L-proline	0.00790885	0.041726	0.0207649
BP	GO:0031214	biomineral tissue development	0.008176	0.0426341	0.0212168
BP	GO:0048660	regulation of smooth muscle cell proliferation	0.00826674	0.0426341	0.0212168
BP	GO:0048659	smooth muscle cell proliferation	0.00863427	0.043388	0.021592
BP	GO:0048251	elastic fiber assembly	0.00869651	0.043388	0.021592
BP	GO:0071492	cellular response to UV-A	0.00869651	0.043388	0.021592
BP	GO:0110148	biomineralization	0.00882077	0.0435348	0.0216651
BP	GO:0001553	luteinization	0.0094836	0.0444181	0.0221046
BP	GO:0006971	hypotonic response	0.0094836	0.0444181	0.0221046
BP	GO:0038063	collagen-activated tyrosine kinase receptor signaling pathway	0.0094836	0.0444181	0.0221046
BP	GO:0071107	response to parathyroid hormone	0.0094836	0.0444181	0.0221046
BP	GO:2001223	negative regulation of neuron migration	0.0094836	0.0444181	0.0221046
BP	GO:0007565	female pregnancy	0.00958489	0.0444391	0.0221151
BP	GO:0060100	positive regulation of phagocytosis, engulfment	0.0102701	0.046673	0.0232268
BP	GO:1905155	positive regulation of membrane invagination	0.0102701	0.046673	0.0232268
BP	GO:0021819	layer formation in cerebral cortex	0.011056	0.047677	0.0237264
BP	GO:0050966	detection of mechanical stimulus involved in sensory perception of pain	0.011056	0.047677	0.0237264
BP	GO:0060009	Sertoli cell development	0.011056	0.047677	0.0237264
BP	GO:0070141	response to UV-A	0.011056	0.047677	0.0237264
BP	GO:0044703	multi-organism reproductive process	0.0116201	0.047677	0.0237264
BP	GO:0003413	chondrocyte differentiation involved in endochondral bone morphogenesis	0.0118413	0.047677	0.0237264
BP	GO:0007567	parturition	0.0118413	0.047677	0.0237264
BP	GO:0019511	peptidyl-proline hydroxylation	0.0118413	0.047677	0.0237264
BP	GO:0032905	transforming growth factor beta1 production	0.0118413	0.047677	0.0237264
BP	GO:0050910	detection of mechanical stimulus involved in sensory perception of sound	0.0118413	0.047677	0.0237264
BP	GO:0060099	regulation of phagocytosis, engulfment	0.0118413	0.047677	0.0237264
BP	GO:1903543	positive regulation of exosomal secretion	0.0118413	0.047677	0.0237264
BP	GO:1905153	regulation of membrane invagination	0.0118413	0.047677	0.0237264
BP	GO:0007179	transforming growth factor beta receptor signaling pathway	0.0123738	0.0493875	0.0245777
BP	GO:0044706	multi-multicellular organism process	0.012593	0.0495331	0.0246501
BP	GO:0070365	hepatocyte differentiation	0.0126261	0.0495331	0.0246501
BP	GO:0007601	visual perception	0.012814	0.0498441	0.0248049
BP	GO:0050953	sensory perception of light stimulus	0.013261	0.0500432	0.024904
BP	GO:0007596	blood coagulation	0.0133738	0.0500432	0.024904
BP	GO:0051969	regulation of transmission of nerve impulse	0.0134103	0.0500432	0.024904
BP	GO:0070206	protein trimerization	0.0134103	0.0500432	0.024904
BP	GO:1903541	regulation of exosomal secretion	0.0134103	0.0500432	0.024904
BP	GO:0050817	coagulation	0.0139443	0.0512173	0.0254883
BP	GO:0007599	hemostasis	0.0140597	0.0512173	0.0254883
BP	GO:0031669	cellular response to nutrient levels	0.0140597	0.0512173	0.0254883
BP	GO:0008406	gonad development	0.0142916	0.0516525	0.0257048
BP	GO:0007160	cell-matrix adhesion	0.0148789	0.0528798	0.0263156
BP	GO:0045137	development of primary sexual characteristics	0.0148789	0.0528798	0.0263156
BP	GO:0001502	cartilage condensation	0.0149769	0.0528798	0.0263156
BP	GO:1990182	exosomal secretion	0.0157593	0.0550809	0.027411
BP	GO:0001649	osteoblast differentiation	0.0158402	0.0550809	0.027411
BP	GO:0033002	muscle cell proliferation	0.0159623	0.0550878	0.0274144
BP	GO:0060008	Sertoli cell differentiation	0.0165411	0.0555441	0.0276415
BP	GO:0071498	cellular response to fluid shear stress	0.0165411	0.0555441	0.0276415
BP	GO:0097734	extracellular exosome biogenesis	0.0165411	0.0555441	0.0276415
BP	GO:0010951	negative regulation of endopeptidase activity	0.0165785	0.0555441	0.0276415
BP	GO:0030728	ovulation	0.0173224	0.0564194	0.0280771
BP	GO:0035313	wound healing, spreading of epidermal cells	0.0173224	0.0564194	0.0280771
BP	GO:0098743	cell aggregation	0.0173224	0.0564194	0.0280771
BP	GO:0003007	heart morphogenesis	0.0173315	0.0564194	0.0280771
BP	GO:0031668	cellular response to extracellular stimulus	0.0178415	0.0576707	0.0286998
BP	GO:0010466	negative regulation of peptidase activity	0.01797	0.0576799	0.0287044
BP	GO:0140112	extracellular vesicle biogenesis	0.0181031	0.0577036	0.0287162
BP	GO:0014850	response to muscle activity	0.0188832	0.0597751	0.029747
BP	GO:0021801	cerebral cortex radial glia-guided migration	0.0196627	0.0601679	0.0299425
BP	GO:0022030	telencephalon glial cell migration	0.0196627	0.0601679	0.0299425
BP	GO:0048745	smooth muscle tissue development	0.0196627	0.0601679	0.0299425
BP	GO:0050927	positive regulation of positive chemotaxis	0.0196627	0.0601679	0.0299425
BP	GO:0062149	detection of stimulus involved in sensory perception of pain	0.0196627	0.0601679	0.0299425
BP	GO:0006929	substrate-dependent cell migration	0.0204417	0.061325	0.0305184
BP	GO:0050926	regulation of positive chemotaxis	0.0204417	0.061325	0.0305184
BP	GO:0060740	prostate gland epithelium morphogenesis	0.0204417	0.061325	0.0305184
BP	GO:0018126	protein hydroxylation	0.0212201	0.0623054	0.0310062
BP	GO:0032967	positive regulation of collagen biosynthetic process	0.0212201	0.0623054	0.0310062
BP	GO:0051291	protein heterooligomerization	0.0212201	0.0623054	0.0310062
BP	GO:0007548	sex differentiation	0.0213114	0.0623054	0.0310062
BP	GO:0010714	positive regulation of collagen metabolic process	0.0219979	0.0635032	0.0316023
BP	GO:0060512	prostate gland morphogenesis	0.0219979	0.0635032	0.0316023
BP	GO:0001666	response to hypoxia	0.022432	0.0643517	0.0320246
BP	GO:0001958	endochondral ossification	0.0227751	0.0645294	0.032113
BP	GO:0036075	replacement ossification	0.0227751	0.0645294	0.032113
BP	GO:0030204	chondroitin sulfate metabolic process	0.0235517	0.0660185	0.032854
BP	GO:0048608	reproductive structure development	0.0238668	0.0660185	0.032854
BP	GO:0007162	negative regulation of cell adhesion	0.0241583	0.0660185	0.032854
BP	GO:0036293	response to decreased oxygen levels	0.0243046	0.0660185	0.032854
BP	GO:0034505	tooth mineralization	0.0243278	0.0660185	0.032854
BP	GO:0045987	positive regulation of smooth muscle contraction	0.0243278	0.0660185	0.032854
BP	GO:0060070	canonical Wnt signaling pathway	0.0244513	0.0660185	0.032854
BP	GO:0061458	reproductive system development	0.0244513	0.0660185	0.032854
BP	GO:1990776	response to angiotensin	0.0251033	0.0673825	0.0335328
BP	GO:0021799	cerebral cortex radially oriented cell migration	0.0266525	0.0699058	0.0347886
BP	GO:0034405	response to fluid shear stress	0.0266525	0.0699058	0.0347886
BP	GO:0035025	positive regulation of Rho protein signal transduction	0.0266525	0.0699058	0.0347886
BP	GO:0048333	mesodermal cell differentiation	0.0266525	0.0699058	0.0347886
BP	GO:0050654	chondroitin sulfate proteoglycan metabolic process	0.0274263	0.0715265	0.0355951
BP	GO:0010922	positive regulation of phosphatase activity	0.0281995	0.0719087	0.0357853
BP	GO:0031646	positive regulation of nervous system process	0.0281995	0.0719087	0.0357853
BP	GO:0035909	aorta morphogenesis	0.0281995	0.0719087	0.0357853
BP	GO:0071711	basement membrane organization	0.0281995	0.0719087	0.0357853
BP	GO:0048545	response to steroid hormone	0.0288641	0.0726678	0.0361631
BP	GO:0044319	wound healing, spreading of cells	0.0289721	0.0726678	0.0361631
BP	GO:0090505	epiboly involved in wound healing	0.0289721	0.0726678	0.0361631
BP	GO:0090504	epiboly	0.0297442	0.0741987	0.036925
BP	GO:0045861	negative regulation of proteolysis	0.03094	0.0763857	0.0380133
BP	GO:0007265	Ras protein signal transduction	0.0311021	0.0763857	0.0380133
BP	GO:0032965	regulation of collagen biosynthetic process	0.0312865	0.0763857	0.0380133
BP	GO:0048246	macrophage chemotaxis	0.0312865	0.0763857	0.0380133
BP	GO:0001655	urogenital system development	0.0322467	0.0783134	0.0389726
BP	GO:0071604	transforming growth factor beta production	0.0328266	0.0793022	0.0394647
BP	GO:0051602	response to electrical stimulus	0.0335958	0.080315	0.0399687
BP	GO:0071364	cellular response to epidermal growth factor stimulus	0.0335958	0.080315	0.0399687
BP	GO:0014075	response to amine	0.0343644	0.0810116	0.0403154
BP	GO:0014911	positive regulation of smooth muscle cell migration	0.0343644	0.0810116	0.0403154
BP	GO:0051346	negative regulation of hydrolase activity	0.0344167	0.0810116	0.0403154
BP	GO:0010712	regulation of collagen metabolic process	0.0351325	0.0818568	0.040736
BP	GO:0030574	collagen catabolic process	0.0351325	0.0818568	0.040736
BP	GO:0021795	cerebral cortex cell migration	0.0358999	0.0828044	0.0412075
BP	GO:0055010	ventricular cardiac muscle tissue morphogenesis	0.0358999	0.0828044	0.0412075
BP	GO:0070849	response to epidermal growth factor	0.0366668	0.0837317	0.041669
BP	GO:2001222	regulation of neuron migration	0.0366668	0.0837317	0.041669
BP	GO:0001654	eye development	0.0369909	0.0839323	0.0417688
BP	GO:0007178	transmembrane receptor protein serine/threonine kinase signaling pathway	0.0373398	0.0839323	0.0417688
BP	GO:0050878	regulation of body fluid levels	0.0373398	0.0839323	0.0417688
BP	GO:0150063	visual system development	0.0376899	0.0839323	0.0417688
BP	GO:0018208	peptidyl-proline modification	0.0381989	0.0839323	0.0417688
BP	GO:0035094	response to nicotine	0.0381989	0.0839323	0.0417688
BP	GO:0045933	positive regulation of muscle contraction	0.0381989	0.0839323	0.0417688
BP	GO:0009100	glycoprotein metabolic process	0.0382175	0.0839323	0.0417688
BP	GO:0048880	sensory system development	0.0387481	0.0842908	0.0419473
BP	GO:0050900	leukocyte migration	0.0387481	0.0842908	0.0419473
BP	GO:1904707	positive regulation of vascular associated smooth muscle cell proliferation	0.0389641	0.084361	0.0419822
BP	GO:0022602	ovulation cycle process	0.0397288	0.0852126	0.042406
BP	GO:0030850	prostate gland development	0.0397288	0.0852126	0.042406
BP	GO:0048013	ephrin receptor signaling pathway	0.0404928	0.0864475	0.0430205
BP	GO:0003229	ventricular cardiac muscle tissue development	0.0427816	0.0899125	0.0447449
BP	GO:0031103	axon regeneration	0.0427816	0.0899125	0.0447449
BP	GO:1904645	response to amyloid-beta	0.0427816	0.0899125	0.0447449
BP	GO:0043434	response to peptide hormone	0.0429106	0.0899125	0.0447449
BP	GO:0060537	muscle tissue development	0.0430953	0.0899125	0.0447449
BP	GO:0010718	positive regulation of epithelial to mesenchymal transition	0.0435434	0.0904363	0.0450056
BP	GO:0052548	regulation of endopeptidase activity	0.0442102	0.0907849	0.0451791
BP	GO:0008347	glial cell migration	0.0443046	0.0907849	0.0451791
BP	GO:0043388	positive regulation of DNA binding	0.0443046	0.0907849	0.0451791
BP	GO:0001541	ovarian follicle development	0.0450653	0.0919332	0.0457505
BP	GO:0007566	embryo implantation	0.0458254	0.0927207	0.0461424
BP	GO:0002011	morphogenesis of an epithelial sheet	0.0465849	0.0927207	0.0461424
BP	GO:0022029	telencephalon cell migration	0.0465849	0.0927207	0.0461424
BP	GO:0055008	cardiac muscle tissue morphogenesis	0.0465849	0.0927207	0.0461424
BP	GO:1905517	macrophage migration	0.0465849	0.0927207	0.0461424
BP	GO:0048732	gland development	0.0466633	0.0927207	0.0461424
BP	GO:0022617	extracellular matrix disassembly	0.0481023	0.0943545	0.0469554
BP	GO:0031102	neuron projection regeneration	0.0481023	0.0943545	0.0469554
BP	GO:0035904	aorta development	0.0481023	0.0943545	0.0469554
BP	GO:0009314	response to radiation	0.0487785	0.0944995	0.0470276
BP	GO:0021885	forebrain cell migration	0.0488601	0.0944995	0.0470276
BP	GO:0046579	positive regulation of Ras protein signal transduction	0.0488601	0.0944995	0.0470276
BP	GO:0016055	Wnt signaling pathway	0.0495565	0.0944995	0.0470276
BP	GO:0019229	regulation of vasoconstriction	0.0496174	0.0944995	0.0470276
BP	GO:0035306	positive regulation of dephosphorylation	0.0496174	0.0944995	0.0470276
BP	GO:0050918	positive chemotaxis	0.0496174	0.0944995	0.0470276
BP	GO:0198738	cell-cell signaling by wnt	0.0499472	0.0947146	0.0471347
CC	GO:0062023	collagen-containing extracellular matrix	4.23308e-18	1.39692e-16	8.91175e-17
CC	GO:0005583	fibrillar collagen trimer	5.40341e-17	5.94375e-16	3.79187e-16
CC	GO:0098643	banded collagen fibril	5.40341e-17	5.94375e-16	3.79187e-16
CC	GO:0005581	collagen trimer	5.53875e-16	4.56947e-15	2.91513e-15
CC	GO:0005788	endoplasmic reticulum lumen	2.21216e-15	1.46002e-14	9.31434e-15
CC	GO:0098644	complex of collagen trimers	4.34633e-15	2.39048e-14	1.52503e-14
CC	GO:0042383	sarcolemma	0.00013438	0.000633507	0.000404151
CC	GO:0043202	lysosomal lumen	0.00242482	0.0100024	0.00638112
CC	GO:0005796	Golgi lumen	0.0028292	0.0103737	0.00661802
CC	GO:0005775	vacuolar lumen	0.0075943	0.0250612	0.015988
CC	GO:0008305	integrin complex	0.0231575	0.0694724	0.0443205
CC	GO:0098636	protein complex involved in cell adhesion	0.0385594	0.106038	0.067648
CC	GO:0009897	external side of plasma membrane	0.0463881	0.117754	0.0751224
MF	GO:0030020	extracellular matrix structural constituent conferring tensile strength	1.84301e-18	9.58365e-17	4.85002e-17
MF	GO:0005201	extracellular matrix structural constituent	1.17685e-17	3.05982e-16	1.54849e-16
MF	GO:0048407	platelet-derived growth factor binding	7.8086e-14	1.35349e-12	6.84965e-13
MF	GO:0019838	growth factor binding	4.94898e-08	6.43367e-07	3.2559e-07
MF	GO:0050840	extracellular matrix binding	1.17778e-05	0.000122489	6.19882e-05
MF	GO:0005518	collagen binding	2.21203e-05	0.000191709	9.70189e-05
MF	GO:0046332	SMAD binding	3.19776e-05	0.000211528	0.000107048
MF	GO:0005539	glycosaminoglycan binding	3.25427e-05	0.000211528	0.000107048
MF	GO:1901681	sulfur compound binding	5.41232e-05	0.000312712	0.000158255
MF	GO:0002020	protease binding	0.000178693	0.000929203	0.000470244
MF	GO:0005178	integrin binding	0.000251106	0.00118705	0.000600733
MF	GO:0008201	heparin binding	0.000328871	0.00142511	0.000721208
MF	GO:0043394	proteoglycan binding	0.000383262	0.00153305	0.000775833
MF	GO:0004867	serine-type endopeptidase inhibitor activity	0.00280849	0.0104315	0.00527911
MF	GO:0004866	endopeptidase inhibitor activity	0.00915996	0.0301476	0.0152569
MF	GO:0031543	peptidyl-proline dioxygenase activity	0.00972492	0.0301476	0.0152569
MF	GO:0030414	peptidase inhibitor activity	0.00985593	0.0301476	0.0152569
MF	GO:0061135	endopeptidase regulator activity	0.0105749	0.0305498	0.0154604
MF	GO:0043395	heparan sulfate proteoglycan binding	0.0145542	0.03866	0.0195648
MF	GO:0061134	peptidase regulator activity	0.0148692	0.03866	0.0195648
MF	GO:0031418	L-ascorbic acid binding	0.0161591	0.040013	0.0202495
MF	GO:0030021	extracellular matrix structural constituent conferring compression resistance	0.0177615	0.0419818	0.0212458
MF	GO:0043236	laminin binding	0.0225542	0.0509921	0.0258057
MF	GO:0001968	fibronectin binding	0.0249424	0.0540418	0.0273491
MF	GO:0030674	protein-macromolecule adaptor activity	0.0315673	0.06566	0.0332288
MF	GO:0004857	enzyme inhibitor activity	0.0400124	0.0800249	0.0404984
MF	GO:0016706	2-oxoglutarate-dependent dioxygenase activity	0.0477488	0.0919606	0.0465388
